# Supplementary material
Source: HighWire-hosted journal article supplement (https://www.cmajopen.ca/highwire/filestream/81234/field_highwire_adjunct_files/0/2018-0061-1-at.pdf)
Supplement: 2018-0061-1-at.pdf [file 2018-0061-1-at.pdf]

**Appendix 1 (as supplied by the authors): Signs and Symptoms of Lung Cancer Requiring Investigation (Nova Scotia Health Authority's Cancer Care Program (previously Cancer Care Nova Scotia))**

**Signs and symptoms of lung cancer that require immediate referral to emergency department:**

- Acute significant hemoptysis (e.g. 2 tbsp. in one episode, 1 cup in 24 hours).
- Suspected superior vena cava obstruction.
- Stridor/symptomatic central airway obstruction.
- New neurological signs suggestive of brain metastasis or cord compression.
- Symptoms suggestive of paraneoplastic syndrome with severe metabolic disturbance (e.g. hyponatremia hypercalcemia).

**Signs and symptoms of lung cancer that require work up:**

- Hemoptysis.
- Features suggestive of paraneoplastic syndromes.
- Supraclavicular lymphadenopathy.
- Unexplained/uninvestigated increase in dyspnea.
- Features of metastatic lung cancer.
- Unexplained cough persisting for more than 3 weeks.
- Unexplained hoarseness persisting for more than 3 weeks.
- Unexplained weight loss/loss of appetite persisting for more than 3 weeks.
- Unexplained chest and/or shoulder pain persisting for more than 3 weeks.
- Uninvestigated/unexplained abnormal chest signs persisting for more than 3 weeks.
- Unexplained changes in existing symptoms in patients with underlying chronic respiratory problems persisting for more than 3 weeks.
